# Supplementary material
Source: MDPI journal article supplement (https://www.mdpi.com/1999-4907/12/5/573)
Supplement: s1 [file s1]

**Table S1.** Macronutrient concentration of litter fall fractions. GE: Groups of European beech within stands of Norway spruce and Scots pine (CS) near Hummelshain (Thuringia, Central Germany).

| Group                      | Fraction Litter Fall                   | N <sub>t</sub><br>(%) | S<br>(%)          | Ca<br>(%) | Mg<br>(%) | K<br>(%) | Notes/Reference                                                      |
|----------------------------|----------------------------------------|-----------------------|-------------------|-----------|-----------|----------|----------------------------------------------------------------------|
| Plot-specific <sup>1</sup> | leaves (European beech)                | 1.02                  | 0.07              | 0.81      | 0.12      | 0.26     | GE 1, measurement (n=5)                                              |
|                            |                                        | 1.06                  | 0.08              | 0.84      | 0.09      | 0.37     | GE 2, measurement (n=5)                                              |
|                            |                                        | 0.99                  | 0.08              | 0.91      | 0.12      | 0.36     | GE 3, measurement (n=5)                                              |
|                            |                                        | 1.05                  | 0.08              | 1.16      | 0.15      | 0.31     | GE 4, measurement (n=5)                                              |
|                            |                                        | 0.84                  | 0.07              | 1.32      | 0.19      | 0.21     | GE 5, measurement (n=5)                                              |
|                            |                                        | 1.00                  | 0.07              | 0.80      | 0.06      | 0.58     | GE 6, measurement (n=5)                                              |
|                            | needles (Scots pine and Norway spruce) | 0.72                  | 0.06              | 0.81      | 0.05      | 0.12     | CS 1, measurement (n=5)                                              |
|                            |                                        | 0.87                  | 0.06              | 0.82      | 0.06      | 0.10     | CS 2, measurement (n=5)                                              |
|                            |                                        | 0.96                  | 0.07              | 0.82      | 0.07      | 0.16     | CS 3, measurement (n=5)                                              |
|                            |                                        | 1.12                  | 0.07              | 1.00      | 0.08      | 0.22     | CS 4, measurement (n=5)                                              |
|                            |                                        | 0.94                  | 0.07              | 0.64      | 0.06      | 0.14     | CS 5, measurement (n=5)                                              |
|                            |                                        | 0.66                  | 0.05              | 0.73      | 0.03      | 0.13     | CS 6, measurement (n=5)                                              |
| Weighted <sup>1,2</sup>    | reproductive parts (European beech)    | 1.26                  | 0.17 <sup>3</sup> | 0.28      | 0.10      | 0.35     | GE 1, weighted, calculated from husks and beechnuts, see below       |
|                            |                                        | 1.00                  | 0.15 <sup>3</sup> | 0.23      | 0.07      | 0.28     | GE 2, weighted, calculated from husks and beechnuts, see below       |
|                            |                                        | 0.99                  | 0.14 <sup>3</sup> | 0.24      | 0.07      | 0.26     | GE 3, weighted, calculated from husks and beechnuts, see below       |
|                            |                                        | 0.89                  | 0.17 <sup>3</sup> | 0.22      | 0.06      | 0.25     | GE 4, weighted, calculated from husks and beechnuts, see below       |
|                            |                                        | 1.69                  | 0.18 <sup>3</sup> | 0.35      | 0.12      | 0.39     | GE 5, weighted, calculated from husks and beechnuts, see below       |
|                            |                                        | 1.56                  | 0.17 <sup>3</sup> | 0.31      | 0.09      | 0.43     | GE 6, weighted, calculated from husks and beechnuts, see below       |
|                            | husk (European beech)                  | 0.24                  | NA                | 0.12      | 0.02      | 0.11     | assumption: like twig European beech, Lyr et al. (1992) <sup>4</sup> |
|                            | beechnut (European beech)              | 2.88                  | 0.17              | 0.53      | 0.23      | 0.74     | GE 1, measurement (n=5)                                              |
|                            |                                        | 2.80                  | 0.15              | 0.50      | 0.18      | 0.69     | GE 2, measurement (n=5)                                              |
|                            |                                        | 2.82                  | 0.14              | 0.54      | 0.20      | 0.63     | GE 3, measurement (n=5)                                              |
|                            |                                        | 3.21                  | 0.17              | 0.60      | 0.20      | 0.75     | GE 4, measurement (n=5)                                              |
|                            |                                        | 3.46                  | 0.18              | 0.64      | 0.23      | 0.73     | GE 5, measurement (n=5)                                              |
|                            |                                        | 0.24                  | 0.17              | 0.54      | 0.18      | 0.82     | GE 6, measurement (n=5)                                              |
| Literature                 | bark (European beech)                  | 0.79                  | NA                | 0.85      | 0.04      | 0.14     | branch bark (European beech), Lyr et al. (1992) <sup>4</sup>         |
|                            | twig (European beech)                  | 0.24                  | NA                | 0.12      | 0.02      | 0.11     | dead twig material, diameter: 1 cm, Lyr et al. (1992) <sup>4</sup>   |
|                            | cone (Norway spruce)                   | 0.48                  | 0.04              | 0.02      | 0.06      | 0.30     | Hågvar (2016) <sup>5</sup>                                           |
|                            | cone (Scots pine)                      | 0.28                  | NA                | 0.01      | 0.01      | 0.12     | Lim and Cousens (1986) <sup>6</sup>                                  |
|                            | bark (Scots pine)                      | 0.47                  | NA                | 0.80      | 0.09      | 0.26     | fine bark (Scots pine), Lyr et al. (1992) <sup>4</sup>               |
|                            | twig (Norway spruce)                   | 0.73                  | NA                | 0.48      | 0.04      | 0.12     | dead twig material, diameter: 1 cm, Lyr et al. (1992) <sup>4</sup>   |

|                   |      |    |      |      |      |                                                                    |
|-------------------|------|----|------|------|------|--------------------------------------------------------------------|
| twig (Scots pine) | 0.29 | NA | 0.23 | 0.02 | 0.03 | dead twig material, diameter: 1 cm, Lyr et al. (1992) <sup>4</sup> |
|-------------------|------|----|------|------|------|--------------------------------------------------------------------|

<sup>1</sup> without GE ICP and CS ICP

<sup>2</sup> weighted mass of reproductive parts; mean proportion: beech husks (65.2%) and beechnuts (34.8%)

<sup>3</sup> only based on beechnuts

<sup>4</sup> Lyr, H.; Fiedler, H.J.; Tranquillini, W. Physiologie und Ökologie der Gehölze, 1st ed., Gustav Fischer Verlag Jena, Stuttgart, Germany, 1992; pp. 80-82

<sup>5</sup> Hågvar, S. From Litter to Humus in a Norwegian Spruce Forest: Long-Term Studies on the Decomposition of Needles and Cones. *Forests* 2016, 7, 186. doi:10.3390/f7090186

<sup>6</sup> Lim, M. T.; Cousens, J. E. The Internal Transfer of Nutrients in a Scots Pine Stand 2. The Patterns of Transfer and the Effects of Nitrogen Availability. *Forestry* 1986, 59, 17-27.  
<https://doi.org/10.1093/forestry/59.1.17>

**Table S2.** Vegetation data used for the prediction of the herbaceous aboveground biomass and macronutrient stocks with the estimation model PhytoCalc 1.4 at GE and CS. GE: Groups of European beech within stands of Norway spruce and Scots pine (CS) near Hummelshain (Thuringia, Central Germany).

| Plot <sup>1</sup> | Plant Species (Herbaceous Layer) | Growth Group <sup>2</sup><br>(WG, Morphological) | Element Group <sup>2</sup><br>(EG) | Cover<br>(%) | n  | Mean Shoot Length<br>(cm) |
|-------------------|----------------------------------|--------------------------------------------------|------------------------------------|--------------|----|---------------------------|
| GE 1              | <i>Rubus fruticosus</i> agg.     | KST                                              | ST1                                | 0.1          | 1  | 81.5                      |
|                   | <i>Rubus idaeus</i>              | KST                                              | ST1                                | 0.1          | 1  | 89.2                      |
|                   | <i>Dryopteris carthusiana</i>    | F                                                | F2                                 | 0.5          | 9  | 42.1                      |
|                   | <i>Dryopteris dilatata</i>       | F                                                | F1                                 | 0.5          | 6  | 53.0                      |
|                   | <i>Carex canescens</i>           | KG                                               | G1                                 | 0.5          | 5  | 38.2                      |
|                   | <i>Carex pilulifera</i>          | KG                                               | G2                                 | 0.5          | 4  | 21.5                      |
|                   | <i>Carex remota</i>              | KG                                               | G1                                 | 3.0          | 15 | 51.6                      |
|                   | <i>Juncus effusus</i>            | MG                                               | G1                                 | 0.5          | 5  | 90.4                      |
|                   | <i>Impatiens parviflora</i>      | GK                                               | K3                                 | 0.5          | 4  | 19.1                      |
|                   | <i>Oxalis acetosella</i>         | KK                                               | K4                                 | 0.5          | 15 | 5.8                       |
| CS 1              | <i>Rubus fruticosus</i> agg.     | KST                                              | ST1                                | 15.0         | 15 | 108.7                     |
|                   | <i>Rubus idaeus</i>              | KST                                              | ST1                                | 0.5          | 5  | 103.3                     |
|                   | <i>Vaccinium myrtillus</i>       | ZST                                              | ST2                                | 3.0          | 15 | 27.3                      |
|                   | <i>Dryopteris carthusiana</i>    | F                                                | F2                                 | 3.0          | 15 | 43.4                      |
|                   | <i>Dryopteris dilatata</i>       | F                                                | F1                                 | 3.0          | 15 | 68.5                      |
|                   | <i>Carex canescens</i>           | KG                                               | G1                                 | 0.5          | 5  | 47.0                      |
|                   | <i>Carex pilulifera</i>          | KG                                               | G2                                 | 0.1          | 2  | 19.5                      |
|                   | <i>Deschampsia flexuosa</i>      | KG                                               | G2                                 | 0.5          | 15 | 43.2                      |
|                   | <i>Juncus effusus</i>            | MG                                               | G1                                 | 0.1          | 2  | 71.2                      |
|                   | <i>Luzula pilosa</i>             | KG                                               | G2                                 | 0.5          | 3  | 33.0                      |
|                   | <i>Milium effusum</i>            | GG                                               | G1                                 | 0.5          | 15 | 82.0                      |
|                   | <i>Epilobium angustifolium</i>   | GK                                               | K4                                 | 0.5          | 3  | 52.4                      |
|                   | <i>Impatiens parviflora</i>      | GK                                               | K3                                 | 0.5          | 5  | 21.0                      |
|                   | <i>Moehringia trinervia</i>      | KK                                               | K3                                 | 0.5          | 5  | 11.3                      |
|                   | <i>Oxalis acetosella</i>         | KK                                               | K4                                 | 0.5          | 15 | 5.2                       |
| CS 2              | <i>Vaccinium myrtillus</i>       | ZST                                              | ST2                                | 0.5          | 7  | 33.8                      |
|                   | <i>Dryopteris dilatata</i>       | F                                                | F1                                 | 0.5          | 5  | 69.6                      |
|                   | <i>Carex pilulifera</i>          | KG                                               | G2                                 | 0.5          | 5  | 21.1                      |
|                   | <i>Juncus effusus</i>            | MG                                               | G1                                 | 0.1          | 1  | 82.4                      |
| GE 3              | <i>Impatiens parviflora</i>      | GK                                               | K3                                 | 0.5          | 4  | 16.9                      |
| CS 3              | <i>Vaccinium myrtillus</i>       | ZST                                              | ST2                                | 0.5          | 9  | 15.7                      |
|                   | <i>Athyrium filix-femina</i>     | F                                                | F1                                 | 0.5          | 3  | 35.4                      |
|                   | <i>Dryopteris carthusiana</i>    | F                                                | F2                                 | 0.5          | 7  | 41.0                      |
|                   | <i>Dryopteris dilatata</i>       | F                                                | F1                                 | 3.0          | 15 | 55.1                      |
|                   | <i>Dryopteris filix-mas</i>      | F                                                | F1                                 | 0.1          | 6  | 43.9                      |
|                   | <i>Agrostis stolonifera</i>      | MG                                               | G2                                 | 0.1          | 2  | 31.2                      |
|                   | <i>Carex leporina</i>            | KG                                               | G2                                 | 0.5          | 6  | 35.2                      |
|                   | <i>Carex pilulifera</i>          | KG                                               | G2                                 | 0.5          | 6  | 30.9                      |
|                   | <i>Deschampsia flexuosa</i>      | KG                                               | G2                                 | 3.0          | 15 | 33.3                      |
|                   | <i>Holcus lanatus</i>            | MG                                               | G1                                 | 0.5          | 10 | 94.3                      |
|                   | <i>Juncus effusus</i>            | MG                                               | G1                                 | 0.5          | 3  | 79.7                      |
|                   | <i>Cardamine flexuosa</i>        | MK                                               | K2                                 | 0.5          | 5  | 13.9                      |
|                   | <i>Cerastium holosteoides</i>    | MK                                               | K3                                 | 0.5          | 5  | 32.7                      |
|                   | <i>Impatiens parviflora</i>      | GK                                               | K3                                 | 3.0          | 15 | 27.1                      |
|                   | <i>Maianthemum bifolium</i>      | MK                                               | K4                                 | 0.5          | 11 | 8.4                       |
|                   | <i>Moehringia trinervia</i>      | KK                                               | K3                                 | 0.5          | 5  | 13.7                      |
|                   | <i>Mycelis muralis</i>           | GK                                               | K4                                 | 0.5          | 5  | 36.1                      |
|                   | <i>Oxalis acetosella</i>         | KK                                               | K4                                 | 0.5          | 15 | 5.7                       |
|                   | <i>Scorzoneroide autumnalis</i>  | MK                                               | K2                                 | 0.5          | 4  | 23.5                      |
|                   | <i>Stellaria palustris</i>       | MK                                               | K3                                 | 0.5          | 5  | 29.3                      |

|      |                                         |     |     |      |    |       |
|------|-----------------------------------------|-----|-----|------|----|-------|
|      | <i>Veronica montana</i>                 | MK  | K2  | 0.5  | 4  | 14.3  |
| GE 4 | <i>Rubus fruticosus</i> agg.            | KST | ST1 | 0.1  | 1  | 78.7  |
|      | <i>Impatiens parviflora</i>             | GK  | K3  | 0.5  | 5  | 16.9  |
| CS 4 | <i>Rubus fruticosus</i> agg.            | KST | ST1 | 0.5  | 5  | 127.0 |
|      | <i>Rubus idaeus</i>                     | KST | ST1 | 15.0 | 15 | 93.2  |
|      | <i>Dryopteris carthusiana</i>           | F   | F2  | 0.1  | 4  | 56.3  |
|      | <i>Dryopteris dilatata</i>              | F   | F1  | 0.5  | 8  | 60.1  |
|      | <i>Dryopteris filix-mas</i>             | F   | F1  | 0.5  | 7  | 60.8  |
|      | <i>Deschampsia flexuosa</i>             | KG  | G2  | 0.5  | 15 | 55.2  |
|      | <i>Festuca gigantea</i>                 | GG  | G1  | 0.5  | 4  | 99.5  |
|      | <i>Holcus lanatus</i>                   | MG  | G1  | 0.1  | 3  | 58.0  |
|      | <i>Juncus effusus</i>                   | MG  | G1  | 0.1  | 1  | 80.7  |
|      | <i>Milium effusum</i>                   | GG  | G1  | 0.5  | 3  | 69.0  |
|      | <i>Poa nemoralis</i>                    | MG  | G1  | 0.5  | 5  | 54.4  |
|      | <i>Poa trivialis</i>                    | MG  | G1  | 0.5  | 3  | 54.1  |
|      | <i>Alliaria petiolata</i>               | GK  | K2  | 0.5  | 2  | 24.7  |
|      | <i>Cardamine flexuosa</i>               | MK  | K2  | 0.5  | 5  | 37.0  |
|      | <i>Epilobium angustifolium</i>          | GK  | K4  | 0.5  | 5  | 70.6  |
|      | <i>Galium aparine</i>                   | MK  | K2  | 0.5  | 4  | 69.9  |
|      | <i>Galium rotundifolium</i>             | MK  | K2  | 0.5  | 5  | 22.1  |
|      | <i>Geranium robertianum</i>             | MK  | K2  | 3.0  | 15 | 23.9  |
|      | <i>Geum urbanum</i>                     | GK  | K2  | 0.1  | 1  | 47.9  |
|      | <i>Impatiens parviflora</i>             | GK  | K3  | 15.0 | 15 | 20.1  |
|      | <i>Lathyrus linifolius</i>              | MK  | K4  | 0.5  | 3  | 23.8  |
|      | <i>Moehringia trinervia</i>             | KK  | K3  | 3.0  | 15 | 12.7  |
|      | <i>Mycelis muralis</i>                  | GK  | K4  | 0.5  | 7  | 33.8  |
|      | <i>Oxalis acetosella</i>                | KK  | K4  | 3.0  | 15 | 6.3   |
|      | <i>Senecio hercynicus</i>               | GK  | K2  | 0.1  | 1  | 57.8  |
|      | <i>Taraxacum</i> sect. <i>Ruderalia</i> | MK  | K4  | 0.5  | 4  | 21.5  |
|      | <i>Urtica dioica</i>                    | GK  | K1  | 0.5  | 6  | 79.7  |
| GE 5 | <i>Epipactis atrorubens</i>             | MK  | K1  | 0.1  | 1  | 25.9  |
| CS 5 | <i>Vaccinium myrtillus</i>              | ZST | ST2 | 0.5  | 10 | 50.9  |
|      | <i>Dryopteris dilatata</i>              | F   | F1  | 0.5  | 7  | 62.3  |
|      | <i>Pteridium aquilinum</i>              | GF  | F2  | 0.5  | 9  | 93.7  |
| CS 6 | <i>Calluna vulgaris</i>                 | ZST | ST2 | 0.1  | 5  | 22.6  |
|      | <i>Vaccinium myrtillus</i>              | ZST | ST2 | 0.5  | 15 | 35.1  |
|      | <i>Dryopteris carthusiana</i>           | F   | F2  | 0.5  | 7  | 43.9  |
|      | <i>Dryopteris dilatata</i>              | F   | F1  | 0.5  | 6  | 55.0  |
|      | <i>Deschampsia flexuosa</i>             | KG  | G2  | 0.5  | 12 | 41.7  |
|      | <i>Luzula pilosa</i>                    | KG  | G2  | 0.1  | 1  | 32.1  |
|      | <i>Digitalis purpurea</i>               | GK  | K4  | 0.1  | 3  | 98.9  |
|      | <i>Stellaria alsine</i>                 | MK  | K3  | 0.1  | 1  | 16.9  |

<sup>1</sup> without GE ICP and CS ICP; herb layer absent at GE 2 and GE 6

<sup>2</sup> Bolte, A. Biomasse- und Elementvorräte der Bodenvegetation auf Flächen des Forstlichen Umweltmonitorings in Rheinland-Pfalz (BZE, Level II). Berichte des Forschungszentrums Waldökosysteme Reihe B 72, 2006, 81.

**Table S3.** Summary statistics and ANOVA results of the linear mixed-effects models. GE: Groups of European beech within stands of Norway spruce and Scots pine (CS) near Hummelshain (Thuringia, Central Germany).

| Dependent Variable                                            | Forest Type GE     |                        | Intercept          |                        | Observations | Akaike Inf. Crit. | Log Likelihood | R <sup>2</sup> c | R <sup>2</sup> m |
|---------------------------------------------------------------|--------------------|------------------------|--------------------|------------------------|--------------|-------------------|----------------|------------------|------------------|
|                                                               | Value (SE)         | F-Value (numDF; denDF) | Value (SE)         | F-Value (numDF; denDF) |              |                   |                |                  |                  |
| LMM Forest floor (Σ Oi, Oe, Oa) <sup>1</sup>                  |                    |                        |                    |                        |              |                   |                |                  |                  |
| log10(DM) (kg ha <sup>-1</sup> )                              | -0.307 (0.026) *** | 132.88 (1; 77)         | 5.017 (0.059) ***  | 7015.25 (1; 77)        | 84           | -30.09            | 24.05          | 0.39             | 0.22             |
| log10(Ni) (kg ha <sup>-1</sup> )                              | -0.326 (0.029) *** | 120.52 (1; 77)         | 3.133 (0.060) ***  | 2599.45 (1; 77)        | 84           | -18.16            | 18.08          | 0.43             | 0.26             |
| log10(S) (kg ha <sup>-1</sup> )                               | -0.441 (0.034) *** | 167.75 (1; 65)         | 2.195 (0.064) ***  | 1038.58 (1; 65)        | 72           | -6.91             | 12.45          | 0.64             | 0.46             |
| log10(Ca) (kg ha <sup>-1</sup> )                              | -0.341 (0.032) *** | 110.75 (1; 77)         | 2.648 (0.039) ***  | 4813.41 (1; 77)        | 84           | -5.05             | 11.53          | 0.35             | 0.31             |
| log10(Mg) (kg ha <sup>-1</sup> )                              | -0.297 (0.034) *** | 77.87 (1; 77)          | 1.978 (0.056) ***  | 1187.88 (1; 77)        | 84           | 13.21             | 2.39           | 0.29             | 0.19             |
| log10(K) (kg ha <sup>-1</sup> )                               | -0.163 (0.031) *** | 26.91 (1; 77)          | 2.151 (0.257) ***  | 1430.68 (1; 77)        | 84           | -24.75            | 21.37          | 0.24             | 0.07             |
| LMM Mineral soil (Σ 0–10 cm, 10–20 cm, 20–40 cm) <sup>1</sup> |                    |                        |                    |                        |              |                   |                |                  |                  |
| log10(Ni) (kg ha <sup>-1</sup> )                              | 0.015 (0.031)      | 0.25 (1; 77)           | 3.205 (0.033) ***  | 11,887.88 (1; 77)      | 84           | -41.40            | 29.70          | 0.04             | 0.01             |
| log10(S) (kg ha <sup>-1</sup> )                               | -0.037 (0.020)     | 3.57 (1; 65)           | 2.969 (0.025) ***  | 14,924.19 (1; 65)      | 72           | -102.43           | 60.22          | 0.32             | 0.04             |
| log10(Ca) (kg ha <sup>-1</sup> )                              | -0.024 (0.019)     | 1.70 (1; 77)           | 3.733 (0.082) ***  | 2080.33 (1; 77)        | 84           | -69.02            | 43.51          | 0.94             | 0.01             |
| log10(Mg) (kg ha <sup>-1</sup> )                              | 0.008 (0.027)      | 0.09 (1; 77)           | 3.636 (0.164) ***  | 495.98 (1; 77)         | 84           | -33.94            | 25.97          | 0.96             | 0.01             |
| log10(K) (kg ha <sup>-1</sup> )                               | 0.004 (0.024)      | 0.02 (1; 77)           | 3.960 (0.116) ***  | 1006.13 (1; 77)        | 72           | -63.79            | 40.89          | 0.93             | 0.01             |
| LMM Annual litter fall <sup>1</sup>                           |                    |                        |                    |                        |              |                   |                |                  |                  |
| log10(DM) (kg ha <sup>-1</sup> year <sup>-1</sup> )           | 0.311 (0.022) ***  | 197.38 (1; 53)         | 3.426 (0.022) ***  | 362.03 (1; 53)         | 60           | -70.06            | 45.03          | 0.70             | 0.64             |
| log10(Ni) (kg ha <sup>-1</sup> year <sup>-1</sup> )           | 0.651 (0.025) ***  | 498.90 (1; 53)         | 1.228 (0.035) ***  | 2147.72 (1; 53)        | 60           | -46.50            | 33.25          | 0.88             | 0.81             |
| log10(S) (kg ha <sup>-1</sup> year <sup>-1</sup> )            | 0.808 (0.027) ***  | 916.90 (1; 53)         | -0.016 (0.045) *** | 80.14 (1; 53)          | 60           | -35.36            | 27.68          | 0.92             | 0.86             |
| log10(Ca) (kg ha <sup>-1</sup> year <sup>-1</sup> )           | 0.304 (0.021) ***  | 208.80 (1; 53)         | 1.247 (0.045) ***  | 1002.29 (1; 53)        | 60           | -72.34            | 46.17          | 0.89             | 0.57             |
| log10(Mg) (kg ha <sup>-1</sup> year <sup>-1</sup> )           | 0.571 (0.026) ***  | 490.40 (1; 53)         | 0.161 (0.062) ***  | 54.96 (1; 53)          | 60           | -48.33            | 34.16          | 0.85             | 0.67             |
| log10(K) (kg ha <sup>-1</sup> year <sup>-1</sup> )            | 0.708 (0.027) ***  | 658.68 (1; 53)         | 0.555 (0.036) ***  | 736.20 (1; 53)         | 60           | -44.74            | 32.37          | 0.94             | 0.88             |
| LMM Fractional annual loss (turnover rate; k) <sup>1, 2</sup> |                    |                        |                    |                        |              |                   |                |                  |                  |
| log10(DM) (year <sup>-1</sup> )                               | 0.545 (0.057) **   | 92.88 (1; 5)           | -1.593 (0.078) *** | 324.47 (1; 5)          | 12           | 5.03              | 2.49           | 0.98             | 0.68             |
| log10(Ni) (year <sup>-1</sup> )                               | 0.773 (0.055) ***  | 200.22 (1; 5)          | -1.874 (0.089) *** | 305.25 (1; 5)          | 12           | 6.17              | 1.92           | 0.99             | 0.77             |
| log10(S) (year <sup>-1</sup> )                                | 1.156 (0.088) ***  | 174.30 (1; 5)          | -2.128 (0.099) *** | 304.74 (1; 5)          | 12           | 11.31             | -0.66          | 0.99             | 0.86             |
| log10(Ca) (year <sup>-1</sup> )                               | 0.388 (0.086) **   | 20.48 (1; 5)           | -1.320 (0.061) *** | 687.53 (1; 5)          | 12           | 3.84              | 3.08           | 0.99             | 0.65             |
| log10(Mg) (year <sup>-1</sup> )                               | 0.663 (0.118) **   | 31.63 (1; 5)           | -1.767 (0.083) *** | 592.24 (1; 5)          | 12           | 10.20             | -0.10          | 0.99             | 0.74             |
| log10(K) (year <sup>-1</sup> )                                | 0.698 (0.076) **   | 84.93 (1; 5)           | -1.561 (0.094) *** | 200.90 (1; 5)          | 12           | 9.49              | 0.26           | 0.98             | 0.72             |

<sup>1</sup> p-value: \* <0.05, \*\* <0.01, \*\*\* <0.001

<sup>2</sup> residence time is the inverse of the FAL

**Table S4.** Soil data used for the prediction of the annual base cation release ( $\text{Ca}^{2+}$ ,  $\text{Mg}^{2+}$ ,  $\text{K}^+$ ;  $\text{kg ha}^{-1}$ ) from weathering processes in the main rooting zone of the soil matrix at GE and CS according to the soil type-texture approximation for non-calcareous soil profiles given in CLRTAP (2017). GE: Groups of European beech within stands of Norway spruce and Scots pine (CS) near Hummelshain (Thuringia, Central Germany).

| Plot <sup>1</sup> | Texture Class <sup>2</sup> | Parent Material Class <sup>2</sup> | Weathering Rate Class <sup>2</sup> | Main Rooting Zone (m) | MAT (°C) |
|-------------------|----------------------------|------------------------------------|------------------------------------|-----------------------|----------|
| GE 1              | 2                          | acidic                             | 3                                  | 0.44                  | 7.8      |
| CS 1              | 2                          | acidic                             | 3                                  | 0.36                  | 7.8      |
| GE 2              | 2                          | acidic                             | 3                                  | 0.90                  | 7.8      |
| CS 2              | 2                          | acidic                             | 3                                  | 0.80                  | 7.8      |
| GE 3              | 2                          | intermediate                       | 4                                  | 0.82                  | 7.8      |
| CS 3              | 2                          | intermediate                       | 4                                  | 0.25                  | 7.8      |
| GE 4              | 2                          | intermediate                       | 4                                  | 0.64                  | 7.8      |
| CS 4              | 2                          | intermediate                       | 4                                  | 0.70                  | 7.8      |
| GE 5              | 2                          | acidic                             | 3                                  | 0.67                  | 7.8      |
| CS 5              | 2                          | acidic                             | 3                                  | 0.72                  | 7.8      |
| GE 6              | 2                          | acidic                             | 3                                  | 0.87                  | 7.8      |
| CS 6              | 2                          | acidic                             | 3                                  | 0.70                  | 7.8      |

<sup>1</sup> without GE ICP and CS ICP

<sup>2</sup> CLRTAP. Latest update of Guidance on mapping concentrations levels and deposition levels - Manual on methodologies and criteria for modelling and mapping critical loads and levels and air pollution effects, risks and trends. UNECE Convention on Long-range Transboundary Air Pollution, 2017. [www.icpmapping.org](http://www.icpmapping.org)

**Table S5.** Litter fractions and their share in the macronutrient return within the analysed litter at GE and CS. GE: Groups of European beech within stands of Norway spruce and Scots pine (CS) near Hummelshain (Thuringia, Central Germany).

| Litter Fraction                 | N <sub>t</sub> (%) | S (%) | Ca (%) | Mg (%) | K (%) |
|---------------------------------|--------------------|-------|--------|--------|-------|
| <b>GE<sup>1</sup></b>           |                    |       |        |        |       |
| leaves (European beech)         | 52.9               | 38.3  | 82.5   | 67.9   | 59.1  |
| reproductive parts <sup>2</sup> | 45.7               | 61.7  | 15.8   | 31.1   | 39.3  |
| bark                            | 0.6                | NA    | 1.0    | 0.3    | 0.3   |
| twigs (European beech)          | 0.9                | NA    | 0.7    | 0.7    | 1.3   |
| <b>CS<sup>1</sup></b>           |                    |       |        |        |       |
| needles                         | 79.0               | 99.6  | 78.7   | 71.8   | 65.5  |
| reproductive parts <sup>2</sup> | 3.7                | NA    | 0.1    | 3.5    | 9.0   |
| bark                            | 6.4                | NA    | 12.2   | 15.8   | 17.7  |
| twigs (Norway spruce)           | 5.6                | NA    | 4.2    | 3.9    | 4.6   |
| twigs (Scots pine)              | 5.0                | NA    | 4.4    | 4.6    | 2.8   |

<sup>1</sup> without GE ICP and CS ICP

<sup>2</sup> based on weighted mass of reproductive parts  
(forest type-specific: beechnuts, beech husks or cones)

**Table S6.** Macronutrient stocks (in above-ground-tree-biomass, herbaceous ground vegetation, forest floor and mineral soil) for Green Eyes and coniferous sites. GE: Groups of European beech within stands of Norway spruce and Scots pine (CS) near Hummelshain (Thuringia, Central Germany).

| Plot                                                                                                               | OM<br>(Mg ha <sup>-1</sup> ) | N <sub>t</sub><br>(kg ha <sup>-1</sup> ) | S<br>(kg ha <sup>-1</sup> ) | Σ Ca, Mg, K<br>(kg ha <sup>-1</sup> ) | Ca<br>(kg ha <sup>-1</sup> ) | Mg<br>(kg ha <sup>-1</sup> ) | K<br>(kg ha <sup>-1</sup> ) |
|--------------------------------------------------------------------------------------------------------------------|------------------------------|------------------------------------------|-----------------------------|---------------------------------------|------------------------------|------------------------------|-----------------------------|
| <b>Predicted macronutrient stock in above-ground-tree-biomass (dominant tree species, whole-tree) <sup>1</sup></b> |                              |                                          |                             |                                       |                              |                              |                             |
| GE 1                                                                                                               | NA                           | 428                                      | 36                          | 656                                   | 298                          | 67                           | 290                         |
| CS 1                                                                                                               | NA                           | 220                                      | 25                          | 367                                   | 210                          | 38                           | 119                         |
| GE 2                                                                                                               | NA                           | 557                                      | 46                          | 821                                   | 375                          | 85                           | 361                         |
| CS 2                                                                                                               | NA                           | 422                                      | 46                          | 676                                   | 380                          | 65                           | 231                         |
| GE 3                                                                                                               | NA                           | 1026                                     | 85                          | 1571                                  | 714                          | 162                          | 695                         |
| CS 3                                                                                                               | NA                           | 530                                      | 54                          | 863                                   | 481                          | 70                           | 311                         |
| GE 4                                                                                                               | NA                           | 1190                                     | 100                         | 1878                                  | 852                          | 192                          | 835                         |
| CS 4                                                                                                               | NA                           | 558                                      | 55                          | 865                                   | 472                          | 72                           | 321                         |
| GE 5                                                                                                               | NA                           | 561                                      | 46                          | 827                                   | 378                          | 86                           | 364                         |
| CS 5                                                                                                               | NA                           | 314                                      | 32                          | 458                                   | 250                          | 44                           | 165                         |
| GE 6                                                                                                               | NA                           | 520                                      | 42                          | 724                                   | 332                          | 76                           | 316                         |
| CS 6                                                                                                               | NA                           | 214                                      | 25                          | 358                                   | 208                          | 40                           | 110                         |
| <i>GE median</i> <sup>2</sup>                                                                                      | NA                           | 559 (286)                                | 46 (24)                     | 824 (468)                             | 376 (212)                    | 85 (48)                      | 362 (209)                   |
| <i>CS median</i> <sup>2</sup>                                                                                      | NA                           | 368 (137)                                | 39 (12)                     | 567 (215)                             | 315 (116)                    | 54 (15)                      | 198 (85)                    |
| <b>Predicted macronutrient stock in herbaceous ground vegetation <sup>3</sup></b>                                  |                              |                                          |                             |                                       |                              |                              |                             |
| GE 1                                                                                                               | NA                           | 2.54                                     | 0.225                       | 3.18                                  | 0.29                         | 0.158                        | 2.73                        |
| CS 1                                                                                                               | NA                           | 13.51                                    | 0.997                       | 14.41                                 | 4.61                         | 1.823                        | 7.98                        |
| GE 2                                                                                                               | NA                           | NA                                       | NA                          | NA                                    | NA                           | NA                           | NA                          |
| CS 2                                                                                                               | NA                           | 0.60                                     | 0.076                       | 0.68                                  | 0.22                         | 0.066                        | 0.39                        |
| GE 3                                                                                                               | NA                           | 0.04                                     | 0.004                       | 0.07                                  | 0.01                         | 0.004                        | 0.06                        |
| CS 3                                                                                                               | NA                           | 3.92                                     | 0.371                       | 5.32                                  | 0.80                         | 0.311                        | 4.20                        |
| GE 4                                                                                                               | NA                           | 0.09                                     | 0.007                       | 0.12                                  | 0.03                         | 0.011                        | 0.08                        |
| CS 4                                                                                                               | NA                           | 15.27                                    | 1.130                       | 18.26                                 | 4.72                         | 1.791                        | 11.75                       |
| GE 5                                                                                                               | NA                           | 0.03                                     | 0.004                       | 0.06                                  | 0.02                         | 0.004                        | 0.03                        |
| CS 5                                                                                                               | NA                           | 0.66                                     | 0.090                       | 0.73                                  | 0.30                         | 0.086                        | 0.34                        |
| GE 6                                                                                                               | NA                           | NA                                       | NA                          | NA                                    | NA                           | NA                           | NA                          |
| CS 6                                                                                                               | NA                           | 0.73                                     | 0.093                       | 0.83                                  | 0.28                         | 0.083                        | 0.47                        |
| <i>GE median</i> <sup>2</sup>                                                                                      | NA                           | 0.1                                      | 0.01                        | 0.1                                   | 0.03                         | 0.01                         | 0.07                        |
| <i>CS median</i> <sup>2</sup>                                                                                      | NA                           | 2.3                                      | 0.23                        | 3.1                                   | 0.55                         | 0.20                         | 2.34                        |
| <b>Forest floor (Σ Oi, Oe, Oa)</b>                                                                                 |                              |                                          |                             |                                       |                              |                              |                             |
| GE 1                                                                                                               | 90                           | 810                                      | 41                          | 517                                   | 226                          | 87                           | 203                         |
| CS 1                                                                                                               | 122                          | 1731                                     | 155                         | 653                                   | 394                          | 90                           | 170                         |
| GE 2                                                                                                               | 70                           | 889                                      | 72                          | 362                                   | 180                          | 50                           | 132                         |
| CS 2                                                                                                               | 135                          | 1825                                     | 183                         | 767                                   | 474                          | 109                          | 183                         |
| GE 3                                                                                                               | 44                           | 538                                      | 41                          | 421                                   | 242                          | 61                           | 118                         |
| CS 3                                                                                                               | 106                          | 1128                                     | 112                         | 638                                   | 308                          | 108                          | 223                         |
| GE 4                                                                                                               | 25                           | 287                                      | 20                          | 340                                   | 235                          | 43                           | 62                          |
| CS 4                                                                                                               | 81                           | 1288                                     | 137                         | 1171                                  | 818                          | 226                          | 127                         |
| GE 5                                                                                                               | 56                           | 748                                      | 69                          | 922                                   | 678                          | 161                          | 83                          |
| CS 5                                                                                                               | 97                           | 1334                                     | 138                         | 335                                   | 213                          | 39                           | 84                          |
| GE 6                                                                                                               | 87                           | 1142                                     | 83                          | 449                                   | 280                          | 42                           | 126                         |
| CS 6                                                                                                               | 128                          | 1694                                     | 181                         | 468                                   | 303                          | 43                           | 123                         |
| <i>GE mean</i> <sup>2</sup>                                                                                        | 51 (7) ***                   | 641 (89) ***                             | 57 (8) ***                  | 348 (37)                              | 203 (18) ***                 | 48 (6) ***                   | 97 (13) ***                 |
| <i>CS mean</i> <sup>2</sup>                                                                                        | 104 (14) ***                 | 1358 (188) ***                           | 157 (23) ***                | 680 (71)                              | 444 (40) ***                 | 95 (12) ***                  | 141 (19) ***                |
| <b>Mineral soil (Σ 0–10 cm, 10–20 cm, 20–40 cm)</b>                                                                |                              |                                          |                             |                                       |                              |                              |                             |
| GE 1                                                                                                               | NA                           | 1690                                     | 781                         | 24,360                                | 6908                         | 6323                         | 11,129                      |
| CS 1                                                                                                               | NA                           | 1973                                     | 808                         | 20,357                                | 6408                         | 5220                         | 8729                        |
| GE 2                                                                                                               | NA                           | 1968                                     | 834                         | 17,745                                | 5198                         | 4702                         | 7845                        |

|                      |    |            |          |               |             |             |             |
|----------------------|----|------------|----------|---------------|-------------|-------------|-------------|
| CS 2                 | NA | 1610       | 871      | 23,749        | 6277        | 5799        | 11,673      |
| GE 3                 | NA | 2108       | 700      | 32,968        | 6870        | 11,247      | 14,851      |
| CS 3                 | NA | 2309       | 864      | 30,233        | 8129        | 9286        | 12,818      |
| GE 4                 | NA | 2027       | 814      | 39,113        | 8511        | 13,092      | 17,510      |
| CS 4                 | NA | 1702       | 857      | 38,102        | 8175        | 12,756      | 17,171      |
| GE 5                 | NA | 1240       | 1140     | 11,630        | 5826        | 1953        | 3851        |
| CS 5                 | NA | 1371       | 726      | 9048          | 3239        | 1888        | 3921        |
| GE 6                 | NA | 1701       | 595      | 7167          | 2703        | 1248        | 3217        |
| CS 6                 | NA | 1637       | 665      | 7130          | 2815        | 1328        | 2987        |
| GE mean <sup>2</sup> | NA | 1661 (127) | 855 (51) | 18,716 (5289) | 5114 (967)  | 4413 (1667) | 9189 (2655) |
| CS mean <sup>2</sup> | NA | 1604 (123) | 932 (56) | 18,858 (5293) | 5407 (1022) | 4331 (1636) | 9120 (2635) |

<sup>1</sup> predicted macronutrient stock in above-ground-tree-biomass (whole-tree, basal-area-weighted and calculated after Block et al. (2016))

<sup>2</sup> without GE ICP and CS ICP; standard deviation (SD) or standard error (SE) in brackets, forest floor and mineral soil:  
LMM estimates, forest type effect (GE, CS) p-value: \* <0.05, \*\* <0.01, \*\*\* <0.001

<sup>3</sup> predicted macronutrient stock of herbaceous ground vegetation (calculated with PhytoCalc 1.4 after Bolte (2006))

**Table S7.** Macronutrient stocks in mineral soil ( $\Sigma$  0-10 cm, 10-20 cm, 20-40 cm) and divided into single depth increments for Green Eyes and coniferous sites. GE: Groups of European beech within stands of Norway spruce and Scots pine (CS) near Hummelshain (Thuringia, Central Germany).

| Plot                                                 | Depth Increment<br>(cm) | $\Sigma$ Ca, Mg, K<br>(kg ha <sup>-1</sup> ) | Ca<br>(kg ha <sup>-1</sup> ) | Mg<br>(kg ha <sup>-1</sup> ) | K<br>(kg ha <sup>-1</sup> ) |
|------------------------------------------------------|-------------------------|----------------------------------------------|------------------------------|------------------------------|-----------------------------|
| Mineral soil ( $\Sigma$ 0–10 cm, 10–20 cm, 20–40 cm) |                         |                                              |                              |                              |                             |
| GE <sup>1</sup>                                      | mineral soil            | 4605                                         | 1614                         | 1020                         | 2351                        |
| CS <sup>1</sup>                                      | mineral soil            | 4632                                         | 1505                         | 1127                         | 2223                        |
| Mineral soil depth increment                         |                         |                                              |                              |                              |                             |
| GE <sup>1</sup>                                      | 0–10 cm                 | 2714                                         | 843                          | 509                          | 1286                        |
| CS <sup>1</sup>                                      | 0–10 cm                 | 2427                                         | 1007                         | 535                          | 1152                        |
| GE <sup>1</sup>                                      | 10–20 cm                | 4080                                         | 1172                         | 1065                         | 1810                        |
| CS <sup>1</sup>                                      | 10–20 cm                | 4545                                         | 1340                         | 1074                         | 2183                        |
| GE <sup>1</sup>                                      | 20–40 cm                | 9372                                         | 2990                         | 3095                         | 6043                        |
| CS <sup>1</sup>                                      | 20–40 cm                | 13,925                                       | 3480                         | 3417                         | 7100                        |

<sup>1</sup> median, without GE ICP and CS ICP

**Table S8.** Fractional annual loss (turnover rate) and residence time in years of the forest floor organic matter (OM) and of macronutrients stored in forest floor ( $\Sigma$  Oi, Oe, Oa) for Green Eyes and coniferous sites. A steady state condition was assumed. GE: Groups of European beech within stands of Norway spruce and Scots pine (CS) near Hummelshain (Thuringia, Central Germany).

| Plot                                                                        | OM              | N <sub>t</sub>   | S                | Ca              | Mg              | K               |
|-----------------------------------------------------------------------------|-----------------|------------------|------------------|-----------------|-----------------|-----------------|
| Fractional annual loss (year <sup>-1</sup> ; turnover rate; k) <sup>1</sup> |                 |                  |                  |                 |                 |                 |
| GE 1                                                                        | 0.06            | 0.07             | 0.13             | 0.11            | 0.06            | 0.07            |
| CS 1                                                                        | 0.02            | 0.01             | 0.004            | 0.04            | 0.01            | 0.02            |
| GE 2                                                                        | 0.08            | 0.06             | 0.08             | 0.15            | 0.09            | 0.13            |
| CS 2                                                                        | 0.02            | 0.01             | 0.01             | 0.03            | 0.01            | 0.02            |
| GE 3                                                                        | 0.12            | 0.09             | 0.12             | 0.12            | 0.08            | 0.13            |
| CS 3                                                                        | 0.02            | 0.02             | 0.01             | 0.06            | 0.01            | 0.02            |
| GE 4                                                                        | 0.19            | 0.17             | 0.26             | 0.16            | 0.13            | 0.21            |
| CS 4                                                                        | 0.05            | 0.03             | 0.01             | 0.04            | 0.01            | 0.06            |
| GE 5                                                                        | 0.10            | 0.08             | 0.08             | 0.08            | 0.06            | 0.16            |
| CS 5                                                                        | 0.04            | 0.02             | 0.01             | 0.10            | 0.05            | 0.06            |
| GE 6                                                                        | 0.05            | 0.05             | 0.06             | 0.10            | 0.07            | 0.17            |
| CS 6                                                                        | 0.02            | 0.01             | 0.004            | 0.05            | 0.02            | 0.03            |
| GE mean <sup>2</sup>                                                        | 0.09 (0.016) ** | 0.08 (0.016) *** | 0.11 (0.024) *** | 0.12 (0.016) ** | 0.08 (0.015) ** | 0.14 (0.030) ** |
| CS mean <sup>2</sup>                                                        | 0.03 (0.005) ** | 0.01 (0.003) *** | 0.01 (0.002) *** | 0.05 (0.007) ** | 0.02 (0.004) ** | 0.03 (0.006) ** |



|                             | Residence time (year) |             |              |           |            |           |
|-----------------------------|-----------------------|-------------|--------------|-----------|------------|-----------|
|                             |                       |             |              |           |            |           |
| GE 1                        | 18                    | 15          | 8            | 9         | 16         | 14        |
| CS 1                        | 55                    | 140         | 224          | 28        | 92         | 64        |
| GE 2                        | 13                    | 16          | 12           | 7         | 12         | 8         |
| CS 2                        | 57                    | 109         | 192          | 29        | 84         | 66        |
| GE 3                        | 9                     | 11          | 8            | 8         | 12         | 8         |
| CS 3                        | 43                    | 51          | 82           | 17        | 69         | 59        |
| GE 4                        | 5                     | 6           | 4            | 6         | 7          | 5         |
| CS 4                        | 23                    | 37          | 70           | 28        | 85         | 17        |
| GE 5                        | 10                    | 13          | 13           | 12        | 17         | 6         |
| CS 5                        | 25                    | 50          | 91           | 10        | 20         | 17        |
| GE 6                        | 18                    | 21          | 18           | 10        | 14         | 6         |
| CS 6                        | 47                    | 124         | 264          | 21        | 43         | 31        |
| <i>GE mean</i> <sup>2</sup> | 11 (2) **             | 13 (3) ***  | 9 (2) ***    | 9 (1) **  | 13 (2) **  | 7 (2) **  |
| <i>CS mean</i> <sup>2</sup> | 39 (7) **             | 75 (15) *** | 134 (31) *** | 21 (3) ** | 59 (11) ** | 36 (8) ** |

<sup>1</sup> calculated for continuous litter fall (CS) as:  $k_1 = L / F$  and for discrete litter fall in autumn (GE) as:  $k_2 = L / (L+F)$ ; F is the dry mass of total forest floor material ( $\sum O_i, O_e, O_a$ ) ( $\text{kg ha}^{-1} \text{ year}^{-1}$ ), the residence time is the inverse of the FAL; fractional annual losses of macronutrients were calculated referred to the calculation of  $k_1$  and  $k_2$ ; the analysed litter fractions cover 79.8% of annual total litter fall at GE and 76.1% at CS

<sup>2</sup> without GE ICP and CS ICP; standard deviation (SD) or standard error (SE) in brackets, LMM estimates, forest type effect (GE, CS) p-value: \* <0.05, \*\* <0.01, \*\*\* <0.001

**Table S9.** Forest floor organic matter (OM) stocks (dry matter) at Green Eyes and coniferous sites. GE: Groups of European beech within stands of Norway spruce and Scots pine (CS) near Hummelshain (Thuringia, Central Germany).

| Plot                        | OM ( $\text{Mg ha}^{-1}$ ) |             |             |
|-----------------------------|----------------------------|-------------|-------------|
|                             | Oi                         | Oe          | Oa          |
| GE 1                        | 7.5                        | 19.0        | 63.4        |
| GE 2                        | 6.3                        | 21.1        | 42.6        |
| GE 3                        | 8.6                        | 19.1        | 37.3        |
| GE 4                        | 7.1                        | 18.2        | NA          |
| GE 5                        | 5.6                        | 26.5        | 24.0        |
| GE 6                        | 7.9                        | 34.3        | 44.9        |
| CS 1                        | 6.6                        | 55.1        | 60.6        |
| CS 2                        | 9.6                        | 68.7        | 56.6        |
| CS 3                        | 9.0                        | 46.3        | 51.2        |
| CS 4                        | 5.9                        | 30.2        | 44.8        |
| CS 5                        | 7.5                        | 64.6        | 25.1        |
| CS 6                        | 7.2                        | 62.7        | 58.4        |
| <i>GE mean</i> <sup>1</sup> | 7.2 (1.0)                  | 23.0 (5.8)  | 42.4 (12.8) |
| <i>CS mean</i> <sup>1</sup> | 7.6 (1.3)                  | 54.6 (13.1) | 49.4 (12.0) |

<sup>1</sup> without GE ICP and CS ICP; standard deviation (SD) in brackets

**Table S10.** Macronutrient fluxes (deposition, litter fall, predicted weathering in soil matrix) and predicted macronutrient budgets for Green Eyes and coniferous sites. GE: Groups of European beech within stands of Norway spruce and Scots pine (CS) near Hummelshain (Thuringia, Central Germany).

| Plot                                                                                              | N <sub>t</sub> <sup>1</sup><br>(kg ha <sup>-1</sup> year <sup>-1</sup> ) | S<br>(kg ha <sup>-1</sup> year <sup>-1</sup> ) | Σ Ca, Mg, K<br>(eq ha <sup>-1</sup> year <sup>-1</sup> ) | Σ Ca, Mg, K<br>(kg ha <sup>-1</sup> year <sup>-1</sup> ) | Ca<br>(kg ha <sup>-1</sup> year <sup>-1</sup> ) | Mg<br>(kg ha <sup>-1</sup> year <sup>-1</sup> ) | K<br>(kg ha <sup>-1</sup> year <sup>-1</sup> ) |
|---------------------------------------------------------------------------------------------------|--------------------------------------------------------------------------|------------------------------------------------|----------------------------------------------------------|----------------------------------------------------------|-------------------------------------------------|-------------------------------------------------|------------------------------------------------|
| <b>Mean annual deposition of macronutrients (Σ throughfall and stemflow; 2001-2018)</b>           |                                                                          |                                                |                                                          |                                                          |                                                 |                                                 |                                                |
| GE ICP                                                                                            | 14 (3)                                                                   | 5 (1)                                          | NA                                                       | 30 (5)                                                   | 8 (1)                                           | 2 (1)                                           | 20 (5)                                         |
| CS ICP                                                                                            | 18 (2)                                                                   | 5 (1)                                          | NA                                                       | 24 (4)                                                   | 6 (1)                                           | 2 (1)                                           | 16 (3)                                         |
| <b>Mean annual macronutrient return (litter fall) <sup>2</sup></b>                                |                                                                          |                                                |                                                          |                                                          |                                                 |                                                 |                                                |
| GE 1                                                                                              | 58                                                                       | 6                                              | NA                                                       | 49                                                       | 28                                              | 6                                               | 16                                             |
| CS 1                                                                                              | 12                                                                       | 1                                              | NA                                                       | 17                                                       | 14                                              | 1                                               | 3                                              |
| GE 2                                                                                              | 60                                                                       | 6                                              | NA                                                       | 55                                                       | 31                                              | 5                                               | 19                                             |
| CS 2                                                                                              | 17                                                                       | 1                                              | NA                                                       | 20                                                       | 16                                              | 1                                               | 3                                              |
| GE 3                                                                                              | 54                                                                       | 6                                              | NA                                                       | 57                                                       | 34                                              | 5                                               | 17                                             |
| CS 3                                                                                              | 22                                                                       | 1                                              | NA                                                       | 24                                                       | 19                                              | 2                                               | 4                                              |
| GE 4                                                                                              | 59                                                                       | 7                                              | NA                                                       | 68                                                       | 45                                              | 7                                               | 17                                             |
| CS 4                                                                                              | 35                                                                       | 2                                              | NA                                                       | 40                                                       | 29                                              | 3                                               | 8                                              |
| GE 5                                                                                              | 64                                                                       | 6                                              | NA                                                       | 85                                                       | 60                                              | 10                                              | 16                                             |
| CS 5                                                                                              | 27                                                                       | 2                                              | NA                                                       | 27                                                       | 21                                              | 2                                               | 5                                              |
| GE 6                                                                                              | 57                                                                       | 5                                              | NA                                                       | 60                                                       | 31                                              | 3                                               | 25                                             |
| CS 6                                                                                              | 14                                                                       | 1                                              | NA                                                       | 19                                                       | 14                                              | 1                                               | 4                                              |
| GE mean <sup>3</sup>                                                                              | 62 (5) ***                                                               | 6 (0.6) ***                                    | NA                                                       | 59 (6)                                                   | 36 (4) ***                                      | 5 (0.2) ***                                     | 18 (2) ***                                     |
| CS mean <sup>3</sup>                                                                              | 17 (1) ***                                                               | 1 (0.1) ***                                    | NA                                                       | 24 (3)                                                   | 18 (2) ***                                      | 2 (0.8) ***                                     | 4 (0.3) ***                                    |
| <b>Predicted annual macronutrient release during weathering in soil matrix<sup>4</sup></b>        |                                                                          |                                                |                                                          |                                                          |                                                 |                                                 |                                                |
| GE 1                                                                                              | NA                                                                       | NA                                             | 377                                                      | 10                                                       | 2                                               | 1                                               | 7                                              |
| CS 1                                                                                              | NA                                                                       | NA                                             | 308                                                      | 8                                                        | 2                                               | 1                                               | 6                                              |
| GE 2                                                                                              | NA                                                                       | NA                                             | 771                                                      | 22                                                       | 5                                               | 2                                               | 15                                             |
| CS 2                                                                                              | NA                                                                       | NA                                             | 685                                                      | 20                                                       | 3                                               | 2                                               | 15                                             |
| GE 3                                                                                              | NA                                                                       | NA                                             | 984                                                      | 27                                                       | 3                                               | 4                                               | 20                                             |
| CS 3                                                                                              | NA                                                                       | NA                                             | 300                                                      | 8                                                        | 2                                               | 1                                               | 6                                              |
| GE 4                                                                                              | NA                                                                       | NA                                             | 768                                                      | 21                                                       | 3                                               | 3                                               | 15                                             |
| CS 4                                                                                              | NA                                                                       | NA                                             | 840                                                      | 23                                                       | 3                                               | 3                                               | 17                                             |
| GE 5                                                                                              | NA                                                                       | NA                                             | 574                                                      | 16                                                       | 5                                               | 1                                               | 10                                             |
| CS 5                                                                                              | NA                                                                       | NA                                             | 617                                                      | 17                                                       | 4                                               | 1                                               | 11                                             |
| GE 6                                                                                              | NA                                                                       | NA                                             | 745                                                      | 21                                                       | 5                                               | 1                                               | 14                                             |
| CS 6                                                                                              | NA                                                                       | NA                                             | 600                                                      | 16                                                       | 4                                               | 1                                               | 11                                             |
| GE median <sup>3</sup>                                                                            | NA                                                                       | NA                                             | 757 (188)                                                | 21 (5)                                                   | 4 (1)                                           | 2 (1)                                           | 15 (4)                                         |
| CS median <sup>3</sup>                                                                            | NA                                                                       | NA                                             | 608 (196)                                                | 17 (6)                                                   | 3 (1)                                           | 1 (1)                                           | 11 (4)                                         |
| <b>Predicted annual macronutrient uptake into tree coarse wood (diameter &gt; 7 cm) and bark</b>  |                                                                          |                                                |                                                          |                                                          |                                                 |                                                 |                                                |
| GE ICP                                                                                            | 6.9 <sup>5</sup>                                                         | NA                                             | 659                                                      | 16                                                       | 8                                               | 1                                               | 6                                              |
| CS ICP                                                                                            | 3.4 <sup>5</sup>                                                         | NA                                             | 282                                                      | 6                                                        | 3                                               | 1                                               | 2                                              |
| <b>Predicted macronutrient budget (deposition - predicted tree uptake) <sup>6</sup></b>           |                                                                          |                                                |                                                          |                                                          |                                                 |                                                 |                                                |
| GE                                                                                                | 7.4                                                                      | NA                                             | NA                                                       | 14.6                                                     | -0.2                                            | 0.9                                             | 13.8                                           |
| CS                                                                                                | 15.0                                                                     | NA                                             | NA                                                       | 17.9                                                     | 3.0                                             | 1.2                                             | 13.6                                           |
| <b>Predicted macronutrient budget (litter fall - predicted tree uptake) <sup>7</sup></b>          |                                                                          |                                                |                                                          |                                                          |                                                 |                                                 |                                                |
| GE                                                                                                | 55.1                                                                     | NA                                             | NA                                                       | 43.0                                                     | 28.0                                            | 4.0                                             | 12.0                                           |
| CS                                                                                                | 13.6                                                                     | NA                                             | NA                                                       | 18.0                                                     | 15.0                                            | 0.8                                             | 2.0                                            |
| <b>Predicted macronutrient budget (predicted weathering - predicted tree uptake) <sup>8</sup></b> |                                                                          |                                                |                                                          |                                                          |                                                 |                                                 |                                                |
| GE                                                                                                | NA                                                                       | NA                                             | 98                                                       | 5                                                        | -4                                              | 0.5                                             | 8                                              |
| CS                                                                                                | NA                                                                       | NA                                             | 327                                                      | 11                                                       | -0.2                                            | 0.6                                             | 9                                              |

<sup>1</sup> solution data with N<sub>t</sub> = Σ NO<sub>3</sub>-N, NH<sub>4</sub><sup>+</sup>, N<sub>org</sub>

<sup>2</sup> mean annual amount of total litter fall (dry matter) at GE and CS (without GE/CS ICP): 5467 ± 275 kg ha<sup>-1</sup> year<sup>-1</sup> (GE), 2671 ± 134 kg ha<sup>-1</sup> year<sup>-1</sup> (CS)

<sup>3</sup> without GE ICP and CS ICP; standard deviation (SD) or standard error (SE) in brackets, litter fall: LMM estimates, forest type effect (GE, CS) p-value: \* <0.05, \*\* <0.01, \*\*\* <0.001

<sup>4</sup> calculated based on soil texture, parent material and the rooting zone of European beech, Scots pine and Norway spruce (CLRTAP 2017)

<sup>5</sup> Schlutow and Ritter (2018)

<sup>6</sup> calculated based on mean deposition (period 2001-2018) in GE ICP ( $\Sigma$  throughfall, stemflow) and CS ICP (throughfall)

<sup>7</sup> calculated based on mean litter fall (period 2016-2017) at GE and CS

<sup>8</sup> calculated based on median from weathering rates of GE and CS
